# Supplementary material
Source: PubMed Central journal article supplement (PMC5495533)
Supplement: PEDS_20170339SupplementaryData.pdf [file PEDS_20170339SupplementaryData.pdf]

## Supplemental Information

### ICD-9 CODES OF THE CHRONIC CONDITIONS INCLUDED IN OUR ANALYSIS

- DIABETES 250–250.91
- METABOLIC DISORDERS 270–273.9, 275–.9
- 270 Disorders of amino-acid transport and metabolism
- 271 Disorders of carbohydrate transport and metabolism
- 272 Disorders of lipid metabolism
- 273 Disorders of plasma protein metabolism
- 275 Disorders of mineral metabolism
- BLOOD DISORDERS 281–.9, 282–9, 283–284.9, 286–286.9, 288–288.9
- 281 Other deficiency anemias
- 282 Hereditary hemolytic anemias (inc sickle)
- 283 Acquired hemolytic anemias
- 284 Aplastic anemia and other bone marrow failure syndromes
- 286 Coagulation defects
- 288 Diseases of white blood cells (ex Leukemia)
- CEREBRAL PALSY 343.0–343.9
- NEURAL DEGENERATION AND DISEASE 330–330.9, 331–331.4, 334–334.2, 340, 341–341.9, 356–356.9
- 330 Cerebral degenerations usually manifesting in childhood
- 331 Other cerebral degenerations (excluding “cerebral degeneration in diseases classified elsewhere, ie alcoholism”)
- 334 Spinocerebellar diseases
- 340 Multiple Sclerosis
- 341 Other demyelinating disease of CNS
- 356 Hereditary and idiopathic peripheral neuropathy
- MUSCULAR DYSTROPHY 335–.9, 359–.9
- 335 Anterior horn cell disease
- 359 Muscular dystrophies
- EPILEPSY AND SEIZURES 345–345.91, 780.3
- 345 Epilepsy and recurrent seizures
- 780.3 Convulsions
- ASTHMA 493–493.91 Page 29
- OTHER RESPIRATORY 770.7
- 770.7 Chronic respiratory disease arising in the perinatal period
- CONGENITAL AND OTHER HEART DISEASE 393–398.9, 414–.9, 416–.9, 745–747.49
- 393 Chronic rheumatic pericarditis
- 394 Diseases of mitral valve
- 395 Diseases of aortic valve
- 396 Diseases of mitral and aortic valves
- 397 Diseases of other endocardial structures
- 398 Other rheumatic heart disease
- 414 Other forms of chronic ischemic heart disease
- 416 Chronic pulmonary heart disease
- 745 Bulbus cordis anomalies and anomalies of cardiac septal closure
- 746 Other congenital anomalies of heart
- 747 Other congenital anomalies of circulatory system
- ENTERITIS AND OTHER DIGESTIVE 555–555.9, 556–.9, 579–579.9
- 555 Regional enteritis
- 556 Ulcerative colitis
- 579 Intestinal malabsorption
- CHROMOSOMAL ANOMALIES 758.0–758.9
- CANCER 140–208.9, 237.7–237.9, 240–246.9
- IMMUNOCOMPROMISED 279–279.9, 288.1–.2
- 279 Disorders involving the immune mechanism
- 288.1 Functional disorders of polymorphonuclear neutrophils
- 288.2 Genetic anomalies of leukocytes
- HIV 042
- AUTOIMMUNE 695.4, 710–710.9, 714–714.9, 720.0–720.9
- 695.4 Lupus
- 710 Diffuse diseases of connective tissue
- 714 Rheumatoid arthritis
- 720 Ankylosing spondylitis and other inflammatory spondylopathies
- MAJOR ORGAN 070–070.9, 277–277.1, 571–572.8, 581–583.9, 585–587, 588–.9
- 070 Viral hepatitis
- 277.0 Cystic fibrosis
- 277.1 Disorders of porphyrin metabolism
- 571 Chronic liver disease and cirrhosis
- 581 Nephrotic syndrome
- 582 Chronic glomerulonephritis
- 583 Nephritis and nephropathy, NOS
- 585 Chronic kidney disease
- 586 Renal failure
- 587 Renal sclerosis
- 588 Disorders resulting from impaired renal function

MENTAL RETARDATION 315–.9,  
317–319

315 Specific delays in development

317 Mild mental retardation

318 Other specified mental  
retardation

319 Unspecified mental retardation

CONGENITAL ANOMALY 740–742.9,  
748–751.9, 756–756.9, 758–759.9

740 Anencephalus and similar  
anomalies

741 Spina bifida

742 Other congenital anomalies of  
the nervous system

748 Congenital anomalies of  
respiratory system

749 Cleft palate and cleft lip

750 Other congenital anomalies of  
upper alimentary tract

751 Other congenital anomalies of  
digestive system

756 Other congenital anomalies of  
musculoskeletal system

758 Chromosomal anomalies

759 Other unspecified congenital  
anomalies
